# Supplementary material for: Mitochondrial Haemoglobin Is Upregulated with Hypoxia in Skeletal Muscle and Has a Conserved Interaction with ATP Synthase and Inhibitory Factor 1
Source: MDPI journal article supplement (doi:10.3390/cells12060912), 2023-03-16
Supplement: s1 [file s1]

## Hb ATP supplementary data sheet

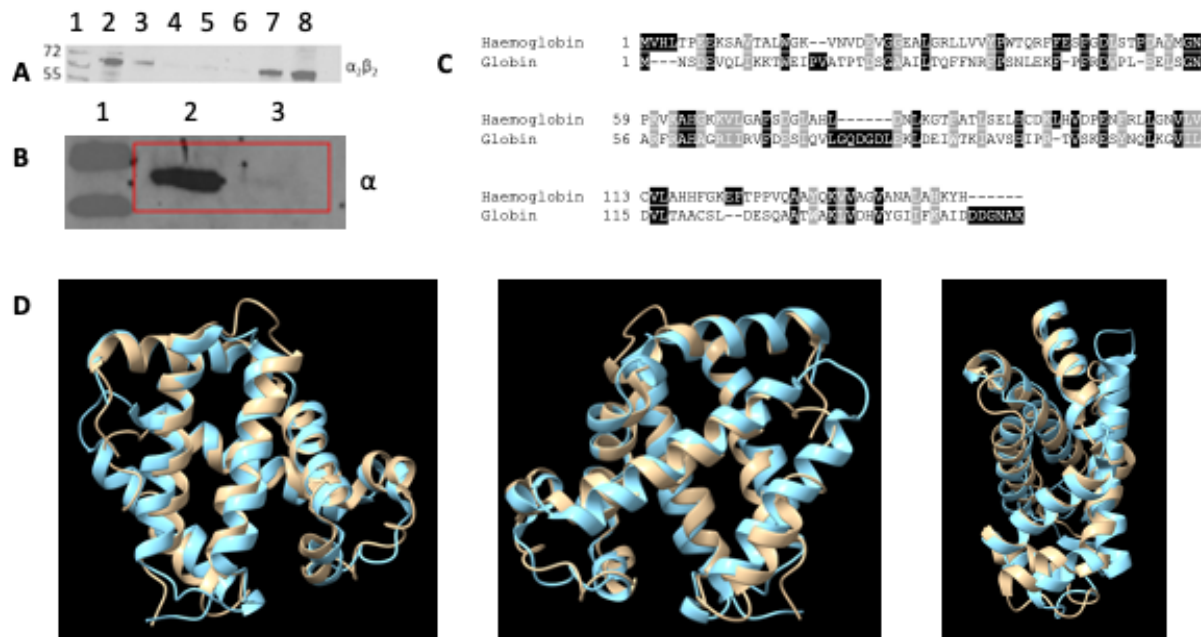

**Supplementary Figure S1** – A) Co-IP of haemoglobin subunits in rat liver, 1 = molecular weight marker, 2 = rat liver lysate, 3 = unbound lysate proteins, 4 = extraction buffer 1, 5 = extraction buffer 2, 6 = extraction buffer 3, 7 = last wash buffer, 8 = elution buffer; B) Co-IP of haemoglobin alpha in Notothenioids with IF1, 1 = molecular weight marker, 2 = unbound lysate protein, 3 = elution buffer; C) Sequence homology of *H. sapiens* haemoglobin  $\beta$  and *D. melanogaster* globin 1; D) Structural alignment of *H. sapiens* haemoglobin  $\beta$  (brown) and *D. melanogaster* globin 1 (blue).

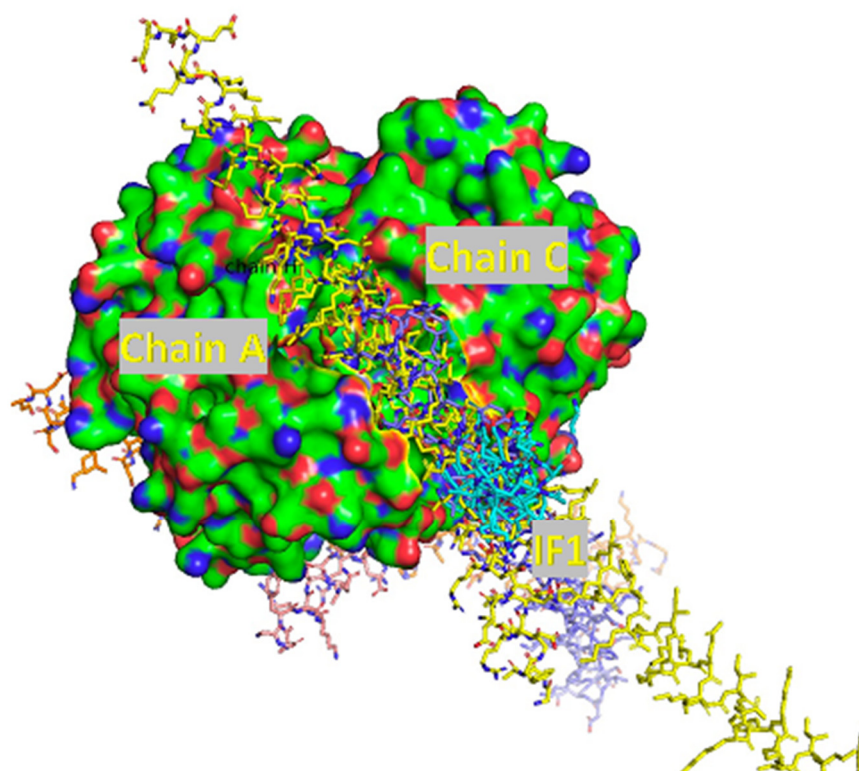

**Supplementary Figure S2** - Top 10 best ranked Docking results for Hb-all chains and IF1. Hb is represented by a molecular green surface, the IF1 structures are represented by different colours.

**Supplementary Table S1** – IF1 interacting residues with Hb. The first part of the table shows residues interacting between IF1 and HbA, and IF1 and Hb all chains from the FireDock best docking pose. Second half of the table shows stable interacting residues that remained through the MD trajectory.

| Before simulation |                               |                     |                                |       |
|-------------------|-------------------------------|---------------------|--------------------------------|-------|
| IF1               | HbA                           | Hb-all chains       |                                | IF1   |
|                   | Chain C                       | Chain A             | Chain C                        |       |
| Arg35             |                               | Asp85               |                                | Arg35 |
| Lys39             |                               | Asp85, Ser81        |                                | Lys39 |
| Leu42             |                               | Ser138              | Val1                           | Leu42 |
| Ala43             |                               | Gly78, Asp75, Pro77 |                                | Ala43 |
| Leu45             |                               |                     | Leu73, Asp74, Leu2, Lys7, Val1 | Leu45 |
| Lys46             |                               | Pro77, Asn131       | Val1                           | Lys46 |
| Lys47             |                               | Asp74               |                                | Lys47 |
| Lys49             |                               |                     | Pro77, Thr134, Asn131, Val135  | Lys49 |
| Glu50             |                               | Leu2                |                                | Glu50 |
| Glu52             | Arg92                         |                     | Asp75, Gly78, Pro77            | Glu52 |
| Ile53             |                               |                     | Ser138                         | Ile53 |
| Ser54             |                               | Ala4                |                                | Ser54 |
| His56             | Ala88, Thr137, Ser138         |                     | Ser81, Pro77                   | His56 |
| Ala57             |                               |                     |                                | Ala57 |
| Glu59             | Pro95                         |                     |                                | Glu59 |
| Ile60             | Thr134, Ser138                |                     | His89, Asp85                   | Ile60 |
| Arg62             | Lys99                         |                     |                                | Arg62 |
| Leu63             | Lys99, Thr134, Ser133, Ala130 |                     |                                | Leu63 |
| Gln64             | Val1                          |                     |                                | Gln64 |
| Glu66             | Lys99                         |                     |                                | Glu66 |
| Ile67             | Ala130, Asn131, Lys127        |                     |                                | Ile67 |
| His70             | Asp126, Lys127                |                     |                                | His70 |
| Lys71             | Lys127, Asp6, Ser3, Leu2      |                     |                                | Lys71 |
| Ile74             | Lys127, Ala123, Asp6          |                     |                                | Ile74 |

## Equilibration Plots

1. Energy Minimisation

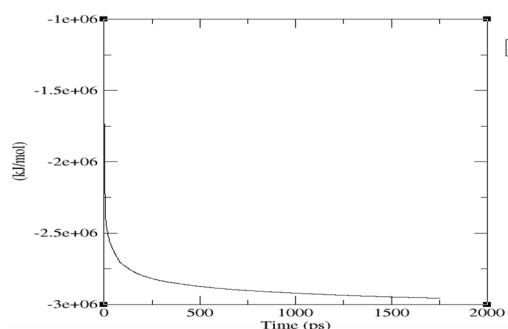

2. Temperature stabilisation (NVT)

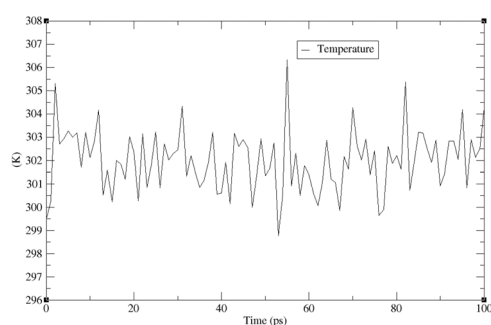

3. Density stabilisation

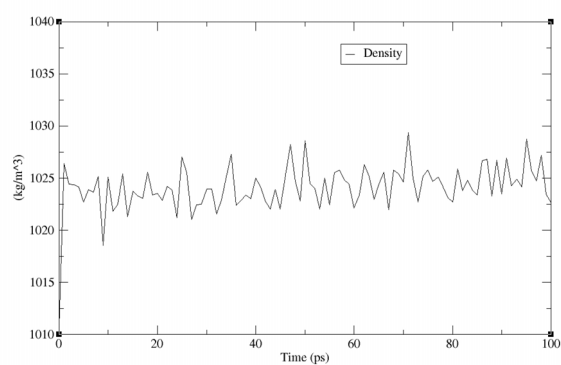

4. Pressure stabilisation (NPT)

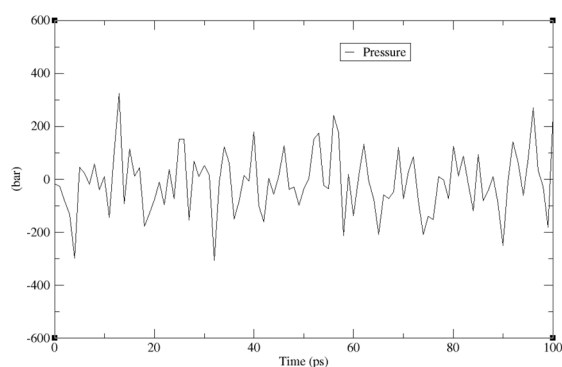

**Supplementary Figure S3** - MD Simulation for Hb and IF1. a) Energy Minimisation of the system, demonstrating a nice steady convergence of potential energy. b) Temperature equilibration (NVT), the plot shows that temperature ranges 302-306 K (average temperature 305 K). c) Pressure equilibration, the pressure fluctuates but in the expected range maintaining the average value. d) Density equilibration, the density plot is very close to the expected values and is stable over time.

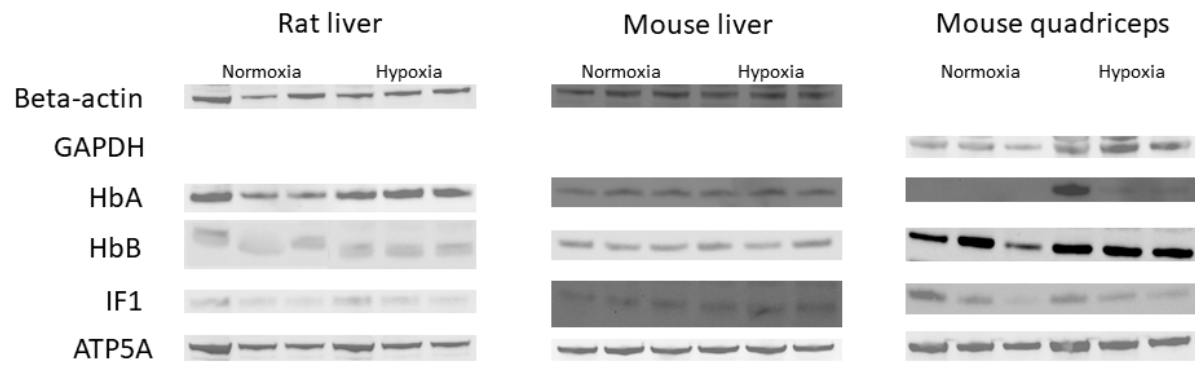

**Supplementary Figure S4** – Western blot relative expression bands for rodent hypoxia tissues (N=3). Beta actin is a loading control in rat liver mitochondria and mouse liver mitochondria samples, GAPDH is a loading control in mouse quadriceps mitochondria samples.

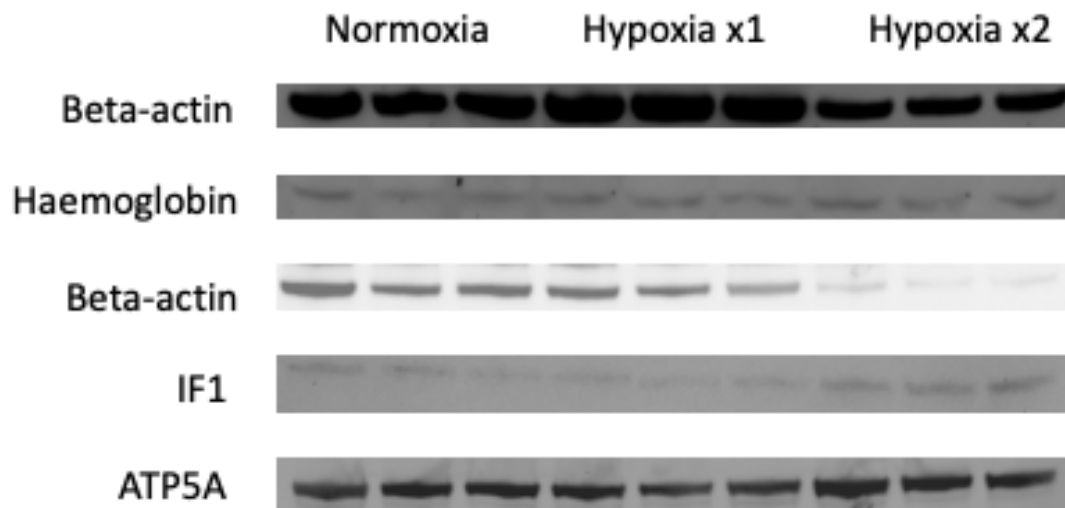

**Supplementary Figure S5** – Western blot relative expression bands for hypoxia exposed *D. melanogaster* mitochondrial isolates (N=3). Beta actin is a loading control.

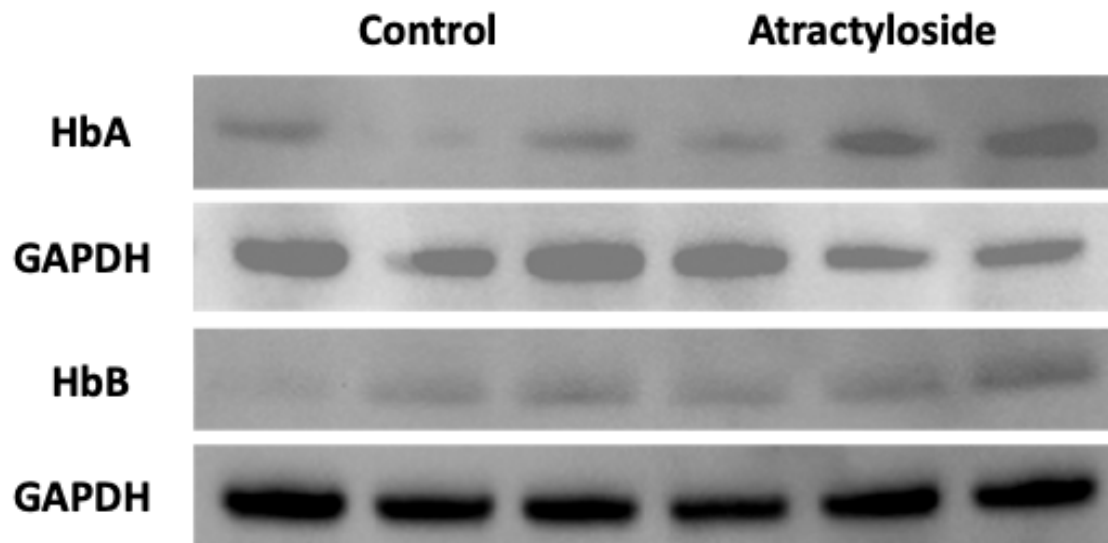

**Supplementary Figure S6** – Western blot relative expression bands for haemoglobin  $\alpha$ , haemoglobin  $\beta$ , and GAPDH in mitochondria isolated from control and atractyloside treated HEPG2 cells.
